# Supplementary material for: Digital stethoscope use by non-physician primary care health workers on under-five-year-old children in rural Bangladesh: feasibility study
Source: Research Square preprint supplement (doi:10.21203/rs.3.rs-7243236/v1), 2025-08-05

Supplementary table 1: Distribution of children with ≥ 3 chest positions’ sound recorded, transferred to laptop and interpretable by CHCP

| **Code of the CHCP** | **Children enrolled** | **≥ 3 chest positions lung sound recorded** | **≥ 3 positions lung sound transferred to laptop** | **≥ 3 chest positions were interpretable** |
| --- | --- | --- | --- | --- |
| **N** | **% [n]** | **n (%)** | **% (95% CI*) [n]** |
| CHCP 1 | 38 | 97.4 [37] | 97.4 [37] | 76.3 (59.8, 88.6) [29] |
| CHCP 2 | 142 | 97.9 [139] | 97.2 [138] | 89.4 (83.2, 94.0) [127] |
| CHCP 3 | 130 | 97.7 [127] | 97.7 [127] | 82.3 (74.6, 88.4) [107] |
| CHCP 4 | 159 | 98.7 [157] | 97.5 [155] | 85.5 (79.1, 90.6) [136] |
| CHCP 5 | 86 | 95.3 [82] | 94.2 [81] | 80.2 (70.2, 88.0) [69] |
| CHCP 6 | 26 | 100.0 [26] | 100.0 [26] | 73.1 (52.2, 88.4) [19] |
| CHCP 7 | 179 | 98.3 [176] | 97.2 [174] | 92.7 (87.9, 96.1) [166] |
| CHCP 8 | 43 | 97.7 [42] | 97.7 [42] | 86.0 (72.1, 94.7) [37] |
| CHCP 9 | 187 | 100.0 [187] | 99.5 [186] | 94.7 (90.4, 97.4) [177] |
| Total | 990 | 98.3 [973] | 97.6 [966] | 87.6 (85.4, 89.6) [867] |

* CI= Confidence interval

Supplementary table 2: Characteristics of children classified to have interpretable lung sound recordings in ≤ 2 vs ≥ 3 chest positions

| **Selected Characteristics** | **Total** | **Children with interpretable recordings in ≤ 2 chest positions** | **Children with interpretable recordings in ≥ 3 chest positions** | **p-value** |
| --- | --- | --- | --- | --- |
| **N** | **n (%)** | **n (%)** |
| **Number of children** | 931 | 64 | 867 |  |
| **Age group** |  |  |  |  |
| 2-11 months | 227 | 22 (9.7) | 205 (90.3) | 0.05 |
| 12-59 months | 704 | 42 (6.0) | 662 (94.0) |  |
| **Sex** |  |  |  |  |
| Male | 515 | 43 (8.3) | 472 (91.7) | <0.05 |
| Female | 416 | 21 (5.0) | 395 (95.0) |  |
| **Oxygen saturation** |  |  |  |  |
| SpO2 90% - 93% | 32 | 4 (12.5) | 28 (87.5) | 0.27 |
| SpO2 94% - 100% | 899 | 60 (6.7) | 839 (93.3) |  |
| **Fever (**≥100.4°F) |  |  |  |  |
| Yes | 74 | 5 (6.8) | 69 (93.2) | 0.97 |
| No | 857 | 59 (6.9) | 798 (93.1) |  |
| **Weight for age** |  |  |  |  |
| Normal (Z Score ≥ -2) | 592 | 47 (7.9) | 545 (92.1) | 0.17 |
| Mild underweight (Z Score ≥ -3 to < -2) | 235 | 10 (4.3) | 225 (95.7) |  |
| Severe underweight (Z Score < -3) | 104 | 7 (6.7) | 97 (93.3) |  |
| **Height for age** |  |  |  |  |
| Normal (Z Score ≥ -2) | 499 | 39 (7.8) | 460 (92.2) | 0.33 |
| Mild stunting (Z Score ≥ -3 to < -2) | 274 | 18 (6.6) | 256 (93.4) |  |
| Severe stunting (Z Score < -3) | 158 | 7 (4.4) | 151 (95.6) |  |
| **Weight for height** |  |  |  |  |
| Normal (Z Score ≥ -2) | 774 | 51 (6.6) | 723 (93.4) | 0.32 |
| Mild wasting (Z Score ≥ -3 to < -2) | 122 | 12 (9.8) | 110 (90.2) |  |
| Severe wasting (Z Score < -3) | 35 | 1 (2.9) | 34 (97.1) |  |
| **Pneumonia status** |  |  |  |  |
| No pneumonia | 565 | 41 (7.3) | 524 (92.7) | 0.57 |
| Pneumonia | 366 | 23 (6.3) | 343 (93.7) |  |

Supplementary figure 1: Distribution of number of enrolment and successfully recorded interpretable lung sounds in ≥ 3 chest positions by CHCPs


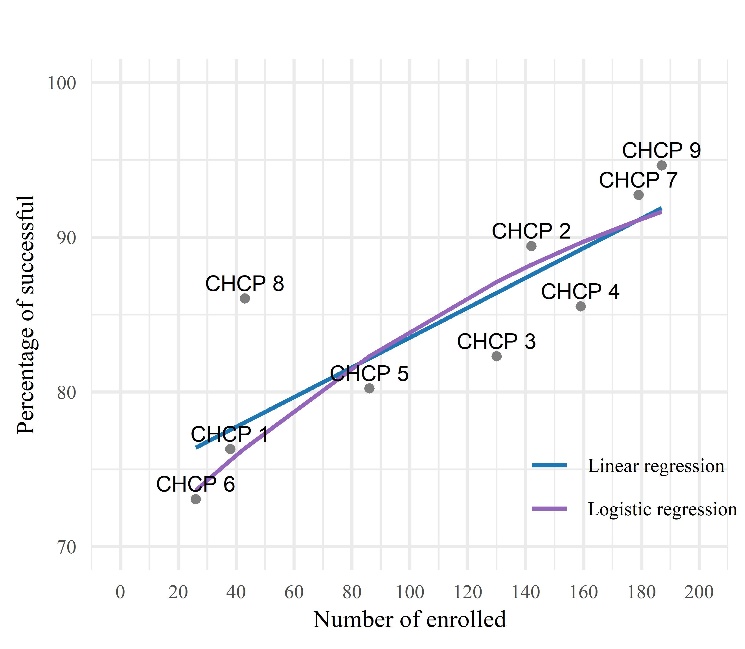

Supplement: Supplementary file 1 [file 319928d22abc6e16764b5f8d.docx]
